# Supplementary material for: Genomic Complexity Predicts Resistance to Endocrine Therapy and CDK4/6 Inhibition in Hormone Receptor–Positive (HR+)/HER2-Negative Metastatic Breast Cancer
Source: PubMed Central journal article supplement — Clin Cancer Res. 2023 Jan 24;29(9):1719–29. doi: 10.1158/1078-0432.CCR-22-2177 (PMC10150240; doi:10.1158/1078-0432.ccr-22-2177), 2023-01-24
Supplement: ccr-22-2177_supplementary_table_1_suppts1.pdf [file ccr-22-2177_supplementary_table_1_suppts1.pdf]

| PredicineATLAS™ Gene Panel |             |                |               |              |              |                |             |             |              |              |              |            |
|----------------------------|-------------|----------------|---------------|--------------|--------------|----------------|-------------|-------------|--------------|--------------|--------------|------------|
| <u>ABL1</u>                | ABL2        | ABRAXAS1       | ACVR1         | ACVR1B       | ACVR2A       | ADARB2         | AKT1        | AKT1S1      | AKT2         | AKT3         | <u>ALK</u>   | ALOX12B    |
| ALOX5                      | AMER1       | ANKRD11        | APC           | APEX1        | AR           | ARAF           | AREG        | ARFRP1      | ARHGAP35     | ARID1A       | ARID1B       | ARID2      |
| ARID5B                     | ASXL1       | ASXL2          | ATM           | ATR          | ATRX         | AURKA          | AURKB       | AXIN1       | AXIN2        | AXL          | B2M          | BABAM1     |
| BAP1                       | BARD1       | BCL10          | <u>BCL2</u>   | BCL2L1       | BCL2L11      | BCL2L2         | BCL6        | BCOR        | BCORL1       | <u>BCR</u>   | BIRC3        | BIRC5      |
| BLM                        | BMPR1A      | <u>BRAF</u>    | BRCA1         | BRCA2        | BRD2         | BRD3           | BRD4        | BRIP1       | BTG1         | BTG2         | BTK          | CALR       |
| CARD11                     | CARM1       | CASP8          | CBFB          | CBL          | CCND1        | CCND2          | CCND3       | CCNE1       | CCNQ         | CD22         | CD274        | CD276      |
| CD70                       | <u>CD74</u> | CD79A          | CD79B         | CDC42        | CDC7         | CDC73          | CDH1        | CDK12       | CDK4         | CDK6         | CDK8         | CDKN1A     |
| CDKN1B                     | CDKN2A      | CDKN2B         | CDKN2C        | CEBPA        | CENPA        | CHEK1          | CHEK2       | CIC         | CNOT3        | CREBBP       | CRKL         | CRLF2      |
| CSF1R                      | CSF3R       | CTCF           | CTLA4         | CTNNA1       | CTNNB1       | CUL3           | CUL4A       | CUX1        | CXCR4        | CYLD         | CYP17A1      | CYP2C19    |
| CYP2D6                     | CYP3A4      | CYSLTR2        | DAXX          | <u>DDIT3</u> | DDR1         | DDR2           | DEPDC5      | DEPTOR      | DICER1       | DIS3         | DLL4         | DNAJB1     |
| DNMT3A                     | DNMT3B      | DOT1L          | DPYD          | DUSP4        | DYRK2        | E2F3           | EED         | <u>EGFR</u> | EIF1AX       | EIF4A2       | EIF4E        | ELF3       |
| ELOC                       | <u>EML4</u> | EMSY           | EP300         | EPAS1        | EPCAM        | EPHA3          | EPHA5       | EPHA7       | EPHB1        | EPHB4        | ERBB2        | ERBB3      |
| ERBB4                      | ERCC1       | ERCC2          | ERCC3         | ERCC4        | ERCC5        | ERCC6          | ERCC8       | EREG        | ERF          | ERG          | ERRF1        | ESR1       |
| <u>ETV1</u>                | <u>ETV4</u> | <u>ETV5</u>    | <u>ETV6</u>   | <u>EWSR1</u> | EXO1         | EZH1           | EZH2        | <u>EZR</u>  | FAAP100      | FAAP20       | FAAP24       | FAM46C     |
| FANCA                      | FANCB       | FANCC          | FANCD2        | FANCE        | FANCF        | FANCG          | FANCI       | FANCL       | FANCM        | FAS          | FAT1         | FBXW7      |
| FEN1                       | FGF10       | FGF12          | FGF14         | FGF19        | FGF23        | FGF3           | FGF4        | FGF6        | <u>FGFR1</u> | <u>FGFR2</u> | <u>FGFR3</u> | FGFR4      |
| FH                         | FLCN        | FLI1           | FLT1          | FLT3         | FLT4         | FOXA1          | FOXL2       | FOXO1       | FOXP1        | FRS2         | FUBP1        | <u>FUS</u> |
| FZD1                       | FZD10       | FZD2           | FZD3          | FZD4         | FZD5         | FZD6           | FZD7        | FZD8        | FZD9         | GATA1        | GATA2        | GATA3      |
| GATA6                      | GEN1        | GID4           | GLI1          | GNA11        | GNA13        | GNAQ           | GNAS        | GPS2        | GREM1        | GRIN2A       | GRM3         | GSK3B      |
| GSTP1                      | H3F3A       | H3F3B          | H3F3C         | HDAC1        | HDAC2        | HELQ           | HES1        | HEY1        | HEYL         | HGF          | HIST3H3      | HLA-A      |
| HLA-B                      | HNF1A       | HOXB13         | HRAS          | HSD3B1       | HSP90AA1     | ID3            | IDH1        | IDH2        | IDO1         | IFNG         | IFNGR1       | IFNGR2     |
| IGF1                       | IGF1R       | IGF2           | IGF2R         | IKBKE        | IKZF1        | IL10           | IL2RG       | IL7R        | INHA         | INHBA        | INPP4B       | IRF1       |
| IRF2                       | IRF4        | IRS2           | JAK1          | JAK2         | JAK3         | JUN            | KAT6A       | KCNJ5       | KDM1A        | KDM5A        | KDM5C        | KDM6A      |
| KDR                        | KEAP1       | <u>KIT</u>     | KLF4          | KLHL6        | <u>KMT2A</u> | KMT2C          | KMT2D       | KNSTRN      | KRAS         | LATS1        | LATS2        | LIG1       |
| LIG4                       | LMO1        | LYN            | MAD2L2        | MALT1        | MAP2K1       | MAP2K2         | MAP2K4      | MAP3K1      | MAP3K13      | MAP3K14      | MAP4K3       | MAPK1      |
| MAPK3                      | MAPKAP1     | MAX            | MCL1          | MDC1         | MDM2         | MDM4           | MED12       | MEF2B       | MEN1         | <u>MERTK</u> | MET          | MITF       |
| MLH1                       | MLH3        | MLST8          | MPL           | MRAS         | MRE11        | <u>MSH2</u>    | MSH3        | MSH6        | MST1R        | MTHFR        | MTOR         | MUTYH      |
| <u>MYB</u>                 | <u>MYC</u>  | MYCL           | MYCN          | MYD88        | MYOD1        | NBN            | NEGR1       | NF1         | NF2          | NFE2L2       | NFKBIA       | NHEJ1      |
| NKX2-1                     | NKX3-1      | NOTCH1         | <u>NOTCH2</u> | NOTCH3       | NOTCH4       | NPM1           | NPRL2       | NPRL3       | NRAS         | NSD1         | NSD2         | NSD3       |
| NT5C2                      | NTHL1       | <u>NTRK1</u>   | <u>NTRK2</u>  | <u>NTRK3</u> | NUMB         | NUP93          | <u>NTM1</u> | P2RY8       | PAK3         | PALB2        | PARG         | PARP1      |
| PARP2                      | PARP3       | PAX5           | PBRM1         | PDCD1        | PDCD1LG2     | <u>PDGFRA</u>  | PDGFRB      | PDK1        | PDPK1        | PGR          | PHF6         | PHOX2B     |
| PIAS4                      | PIK3C2B     | PIK3C2G        | PIK3C3        | PIK3CA       | PIK3CB       | PIK3CD         | PIK3CG      | PIK3R1      | PIK3R2       | PIK3R3       | PIM1         | PIN1       |
| PLEKHS1                    | PML         | PMS1           | PMS2          | POLD1        | POLE         | POLH           | POLQ        | POU2F2      | PPARG        | PPM1D        | PPP2CA       | PPP2R1A    |
| PPP2R2A                    | PPP3CA      | PPP4R2         | PPP6C         | PRDM1        | PRDM14       | PREX2          | PRKACA      | PRKAR1A     | PRKCI        | PRKD1        | PRKDC        | PRKN       |
| PTCH1                      | PTEN        | PTPN11         | PTPRD         | PTPRT        | QKI          | RAB35          | RAC1        | RAC2        | RAD18        | RAD21        | RAD50        | RAD51      |
| RAD51B                     | RAD51C      | RAD51D         | RAD52         | RAD54L       | <u>RAF1</u>  | <u>RARA</u>    | RASA1       | RB1         | RBM10        | RECQL        | RECQL4       | REL        |
| <u>RET</u>                 | REV3L       | RGS1           | RHEB          | RHOA         | RHOB         | RICTOR         | RIT1        | RNF43       | ROBO1        | ROBO2        | <u>ROS1</u>  | RPA1       |
| RPS6KA3                    | RPTOR       | RRAGC          | RRAS          | RRAS2        | RSPO1        | <u>RSPO2</u>   | RSPO4       | RUNX1       | RXRA         | RYBP         | <u>SDC4</u>  | SDHA       |
| SDHAF2                     | SDHB        | SDHC           | SDHD          | SEM1         | SERPINB3     | SERPINB4       | SESN2       | SETD2       | SF3B1        | SGK1         | SH2B3        | SH2D1A     |
| SHOC2                      | SHQ1        | <u>SLC34A2</u> | SLFN11        | SLX4         | SMAD2        | SMAD3          | SMAD4       | SMARCA2     | SMARCA4      | SMARCB1      | SMARCD1      | SMO        |
| SOC3                       | SOC3S       | SOS1           | SOX10         | SOX17        | SOX2         | SOX9           | SPEN        | SPOP        | SRC          | SRSF2        | SRY          | SS18       |
| STAG2                      | STAT3       | STAT4          | STIL          | STK11        | STK19        | SUFU           | SUZ12       | SYK         | TBC1D7       | TBX3         | TEK          | TERC       |
| TERT                       | TET1        | TET2           | TGFBR1        | TGFBR2       | TMEM127      | <u>TMPRSS2</u> | TNFAIP3     | TNFRSF14    | TNFRSF1A     | TNK2         | TOP1         | TOP2A      |
| TP53                       | TP53BP1     | TP63           | TP73          | TRAF2        | TRAF3        | TRAF7          | TSC1        | TSC2        | TSHR         | TSHZ2        | TYRO3        | U2AF1      |
| UBE2T                      | UGT1A1      | VEGFA          | VEGFB         | VHL          | VTCN1        | WEE1           | WISP3       | WRN         | WT1          | XBP1         | XIAP         | XPA        |
| XPC                        | XPO1        | XRCC1          | XRCC2         | XRCC3        | XRCC4        | XRCC5          | XRCC6       | YAP1        | ZFHX3        | ZNF148       | ZNF217       | ZNF703     |
| ZNRF3                      | ZRSR2       |                |               |              |              |                |             |             |              |              |              |            |

\* Full exonic coverage for all genes except ones used for fusion detection. Fusions genes underlined.

Supplementary Table 1. List of 600 genes targeted by the PredicineATLAS™ panel.
