# Supplementary material for: Genomic Complexity Predicts Resistance to Endocrine Therapy and CDK4/6 Inhibition in Hormone Receptor–Positive (HR+)/HER2-Negative Metastatic Breast Cancer
Source: PubMed Central journal article supplement — Clin Cancer Res. 2023 Jan 24;29(9):1719–29. doi: 10.1158/1078-0432.CCR-22-2177 (PMC10150240; doi:10.1158/1078-0432.ccr-22-2177), 2023-01-24
Supplement: ccr-22-2177_supplementary_table_2_suppts2.pdf [file ccr-22-2177_supplementary_table_2_suppts2.pdf]

| Variable                                | Category                  | Count (%) / Median (IQR) | Clinical Benefit = No | Clinical Benefit = Yes | P value |
|-----------------------------------------|---------------------------|--------------------------|-----------------------|------------------------|---------|
| Age (N=51)                              |                           | 62 (53~67)               | 64(56.75~66)          | 59(53~68)              | 0.652   |
| Race (N=51)                             |                           |                          |                       |                        | 1       |
|                                         | Black or African American | 9 (17.65)                | 2 (20)                | 7 (17.07)              |         |
|                                         | White                     | 42 (82.35)               | 8 (80)                | 34 (82.93)             |         |
| Tumor Grade (N=45)                      |                           |                          |                       |                        | 0.533   |
|                                         | 1                         | 8 (17.78)                | 2 (22.22)             | 6 (16.67)              |         |
|                                         | 2                         | 30 (66.67)               | 7 (77.78)             | 23 (63.89)             |         |
|                                         | 3                         | 7 (15.56)                | 0 (0)                 | 7 (19.44)              |         |
| ER/PR Status (N=49)                     |                           |                          |                       |                        | 0.659   |
|                                         | ER+ / PR+                 | 41 (83.67)               | 8 (80)                | 33 (84.62)             |         |
|                                         | ER+ / PR-                 | 8 (16.33)                | 2 (20)                | 6 (15.38)              |         |
| Tumor Histology (N=51)                  |                           |                          |                       |                        | 0.558   |
|                                         | Ductal                    | 36 (70.59)               | 6 (60)                | 30 (73.17)             |         |
|                                         | Lobular                   | 9 (17.65)                | 2 (20)                | 7 (17.07)              |         |
|                                         | Other                     | 6 (11.76)                | 2 (20)                | 4 (9.76)               |         |
| ECOG Status (N=51)                      |                           |                          |                       |                        | 0.168   |
|                                         | 0                         | 28 (54.9)                | 6 (60)                | 22 (53.66)             |         |
|                                         | 1                         | 19 (37.25)               | 2 (20)                | 17 (41.46)             |         |
|                                         | 2                         | 4 (7.84)                 | 2 (20)                | 2 (4.88)               |         |
| Menopausal Status (N=51)                |                           |                          |                       |                        | 1       |
|                                         | Postmenopausal            | 43 (84.31)               | 9 (90)                | 34 (82.93)             |         |
|                                         | Premenopausal             | 8 (15.69)                | 1 (10)                | 7 (17.07)              |         |
| Endocrine Therapy (N=51)                |                           |                          |                       |                        | 0.113   |
|                                         | Fulvestrant               | 14 (27.45)               | 5 (50)                | 9 (21.95)              |         |
|                                         | Letrozole                 | 37 (72.55)               | 5 (50)                | 32 (78.05)             |         |
| Line of Therapy (N=51)                  |                           |                          |                       |                        | 0.810   |
|                                         | 1st Line                  | 47 (92.15)               | 9 (90)                | 38 (92.7)              |         |
|                                         | 2nd Line                  | 4 (7.84)                 | 1 (10)                | 3 (7.32)               |         |
| Treatment Setting (N=51)                |                           |                          |                       |                        | 0.447   |
|                                         | De novo stage IV          | 17 (33.33)               | 3 (30)                | 14 (34.15)             |         |
|                                         | Endocrine Resistant       | 22 (43.14)               | 6 (60)                | 16 (39.02)             |         |
|                                         | Endocrine Sensitive       | 12 (23.53)               | 1 (10)                | 11 (26.83)             |         |
| Bone Metastasis at Baseline (N=51)      |                           |                          |                       |                        | 0.664   |
|                                         | N                         | 10 (19.61)               | 1 (10)                | 9 (21.95)              |         |
|                                         | Y                         | 41 (80.39)               | 9 (90)                | 32 (78.05)             |         |
| Visceral Metastasis at Baseline (N=51)  |                           |                          |                       |                        | 0.075   |
|                                         | N                         | 25 (49.02)               | 2 (20)                | 23 (56.1)              |         |
|                                         | Y                         | 26 (50.98)               | 8 (80)                | 18 (43.9)              |         |
| Best Treatment Response (RECIST) (N=51) |                           |                          |                       |                        | P<10E-5 |
|                                         | CR                        | 3 (5.88)                 | 0 (0)                 | 3 (7.32)               |         |
|                                         | PR                        | 15 (29.41)               | 0 (0)                 | 15 (36.59)             |         |
|                                         | SD                        | 27 (52.94)               | 4 (40)                | 23 (56.1)              |         |
|                                         | PD                        | 6 (11.76)                | 6 (60)                | 0 (0)                  |         |

**Supplementary Table 2. Patient demographics.** Categorical variables were summarized into count and percentages and frequency differences were compared by Fisher's exact test for patients with and without clinical benefit. Continuous variables were summarized into median with interquartile range (IQR) and were compared by Wilcoxon rank sum test.
