# Supplementary material for: Genomic Complexity Predicts Resistance to Endocrine Therapy and CDK4/6 Inhibition in Hormone Receptor–Positive (HR+)/HER2-Negative Metastatic Breast Cancer
Source: PubMed Central journal article supplement — Clin Cancer Res. 2023 Jan 24;29(9):1719–29. doi: 10.1158/1078-0432.CCR-22-2177 (PMC10150240; doi:10.1158/1078-0432.ccr-22-2177), 2023-01-24
Supplement: ccr-22-2177_supplementary_table_3_suppts3.pdf [file ccr-22-2177_supplementary_table_3_suppts3.pdf]

| Gene    | 95%CI             | Cox model Wald test P value | Log rank test P value | FDR log rank test P value |
|---------|-------------------|-----------------------------|-----------------------|---------------------------|
| PIK3CA  | 2.53 (1.2~5.34)   | 0.015                       | 0.012                 | 0.041                     |
| AKT3    | 3.83 (1.67~8.8)   | 0.002                       | 0.001                 | 0.006                     |
| DDR2    | 3.3 (1.41~7.72)   | 0.006                       | 0.004                 | 0.015                     |
| ESR1    | 3.78 (1.69~8.45)  | 0.001                       | 0.001                 | 0.005                     |
| ATM     | 5.12 (2.2~11.94)  | 0.0002                      | 0.00003               | 0.001                     |
| AURKA   | 5.2 (2.06~13.13)  | 0.0005                      | 0.0001                | 0.002                     |
| MUC16   | 3.07 (1.22~7.7)   | 0.017                       | 0.012                 | 0.041                     |
| BRCA2   | 4.25 (1.51~11.93) | 0.006                       | 0.003                 | 0.013                     |
| CCND1   | 4.13 (1.63~10.45) | 0.003                       | 0.001                 | 0.009                     |
| CCNE2   | 2.83 (1.06~7.58)  | 0.038                       | 0.031                 | 0.084                     |
| DSP     | 5.39 (1.85~15.74) | 0.002                       | 0.001                 | 0.005                     |
| MYC     | 2.94 (1.01~8.59)  | 0.049                       | 0.040                 | 0.105                     |
| PLCG1   | 12.9 (4.05~41.04) | 0.00001                     | 0.0000001             | 0.000003                  |
| RB1     | 3.2 (1.04~9.85)   | 0.042                       | 0.031                 | 0.084                     |
| RUNX1T1 | 4.45 (1.6~12.35)  | 0.004                       | 0.002                 | 0.009                     |
| USH2A   | 4.51 (1.61~12.65) | 0.004                       | 0.002                 | 0.009                     |
| ZFHX3   | 4.27 (1.37~13.33) | 0.013                       | 0.008                 | 0.032                     |

**Supplementary Table 3. Specific gene alterations are associated with shorter PFS.** Gene alterations (including SNVs and CNVs) were analyzed across 50 baseline samples using the PredicineWES™ assay. The presence of a genomic alteration in 17 genes was significantly associated with shorter PFS. Hazard ratios (alteration vs. no alteration) accompanied with 95% confidence intervals and Wald test P values were estimated from univariate Cox proportional hazards regression. Kaplan-Meier analysis was performed and P values were calculated using the log rank test. Raw P values were corrected for multiplicities using the post-hoc Benjamini-Hochberg procedure across all variants.
